# Supplementary material for: Trends in Use of Second-Generation Antipsychotics for Treatment of Bipolar Disorder in the United States, 1998–2009
Source: Atypon-hosted journal article supplement (doi:10.1176/appi.ps.201100092), 2012-01-01

**ONLINE ONLY APPENDIX TABLE 1. TREATMENT VISITS FOR BIPOLAR DISORDER STRATIFIED BY DRUG CLASS, 1998-2009.**

|                                 | 1998 | 1999 | 2000 | 2001 | 2002 | 2003 | 2004 | 2005 | 2006 | 2007 | 2008 | 2009 |
|---------------------------------|------|------|------|------|------|------|------|------|------|------|------|------|
| Mood Stabilizers, %             | 82   | 79   | 79   | 75   | 72   | 75   | 70   | 72   | 71   | 69   | 68   | 67   |
| Second generation               |      |      |      |      |      |      |      |      |      |      |      |      |
| Antipsychotics, %               | 18   | 19   | 25   | 32   | 35   | 37   | 39   | 41   | 45   | 48   | 47   | 49   |
| Antidepressants, %              | 47   | 47   | 48   | 49   | 53   | 52   | 46   | 44   | 42   | 41   | 40   | 41   |
| Anxiolytics, %                  | 21   | 22   | 17   | 14   | 18   | 17   | 17   | 18   | 19   | 18   | 18   | 20   |
| Other, %                        | 7    | 5    | 4    | 4    | 4    | 4    | 4    | 4    | 4    | 4    | 4    | 5    |
| Total Bipolar Visits (millions) | 3.7  | 3.6  | 3.6  | 3.9  | 5.6  | 5.9  | 6.3  | 7.9  | 9.1  | 8.4  | 8.2  | 7.8  |

Column percents exceed 100% because rows are not mutually exclusive (e.g., single visit for bipolar disorder may yield more than one treatment visit if more than one therapy used as treatment); "Other" includes stimulants and typical antipsychotics;  
Source: IMS Health National Disease and Therapeutic Index™, 1998-2009

**ONLINE ONLY APPENDIX FIGURE 1. TREATMENT VISITS FOR BIPOLAR DISORDER DURING WHICH AN SECOND GENERATION ANTIPSYCHOTIC WAS PRESCRIBED, 1998-2009.**

Source: IMS Health National Disease and Therapeutic Index™, 1998-2009

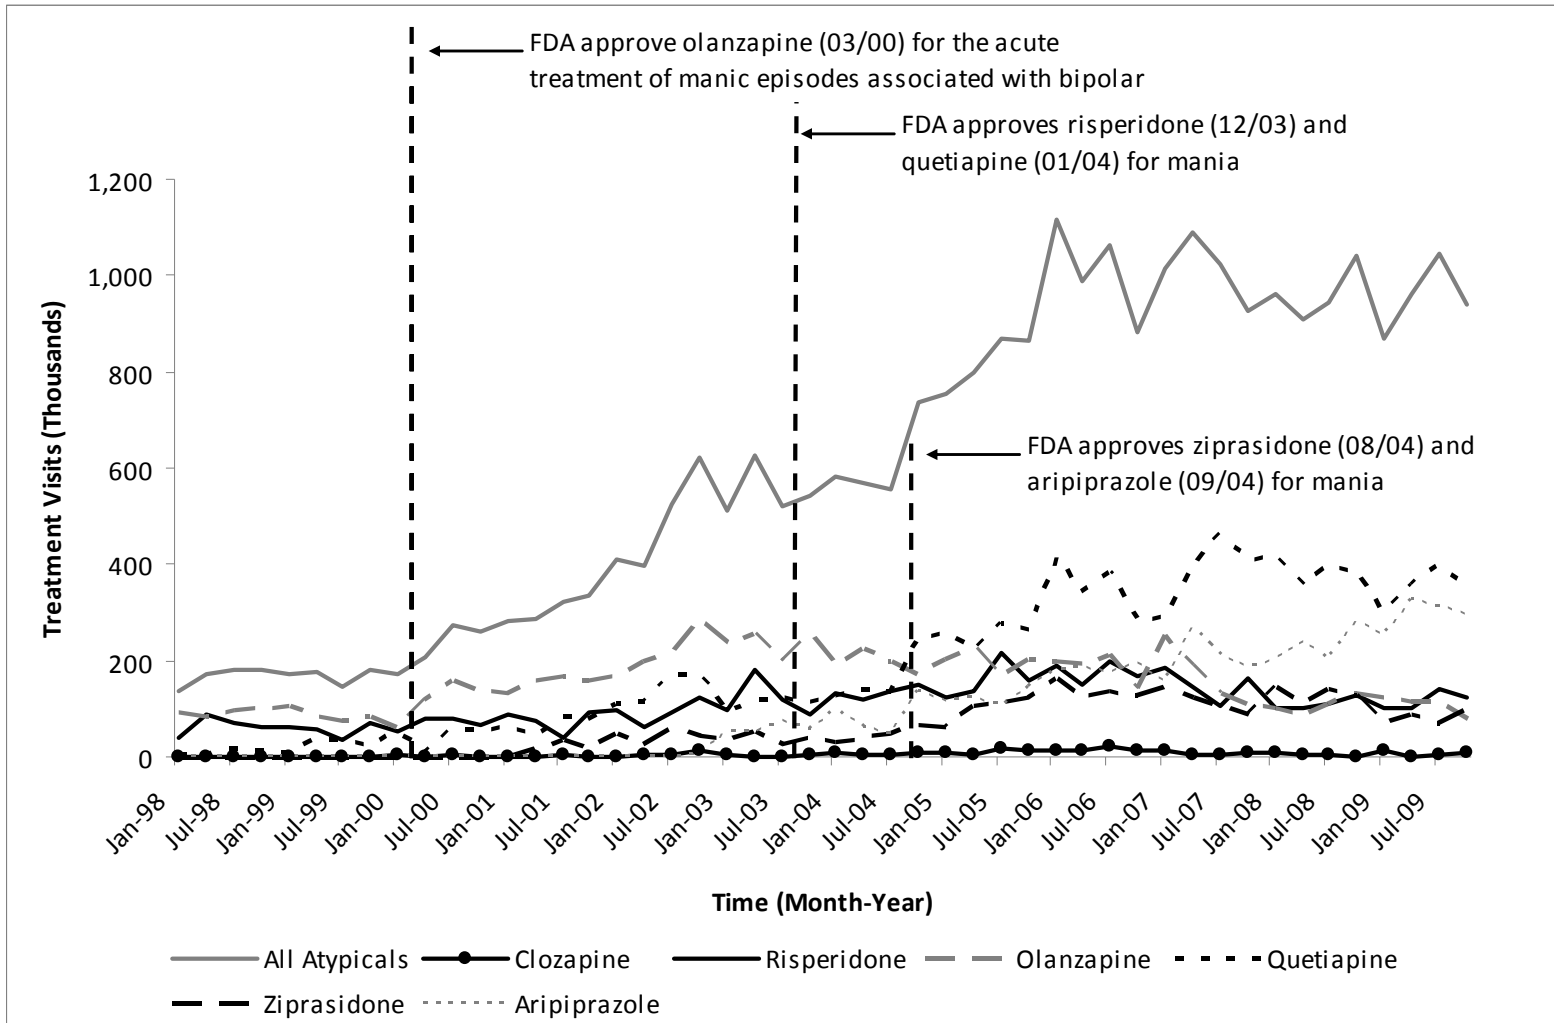

Supplement: pss6301_83_ds1.pdf [file pss6301_83_ds1.pdf]
