# Supplementary material for: Trends in Use of Second-Generation Antipsychotics for Treatment of Bipolar Disorder in the United States, 1998–2009
Source: Atypon-hosted journal article supplement (doi:10.1176/appi.ps.201100092), 2012-01-01
Supplement: pss6301_83_ds2.pdf [file pss6301_83_ds2.pdf]

**ONLINE ONLY APPENDIX TABLE 2. OFFICE VISITS FOR BIPOLAR DISORDER IN WHICH AN ATYPICAL ANTIPSYCHOTIC WAS USED, 1998-2009.**

| Atypical Antipsychotics ...                        | 1998       | 1999       | 2000       | 2001       | 2002       | 2003       | 2004       | 2005       | 2006       | 2007       | 2008       | 2009       |
|----------------------------------------------------|------------|------------|------------|------------|------------|------------|------------|------------|------------|------------|------------|------------|
| ...Used Alone, %                                   | 7          | 11         | 10         | 13         | 10         | 17         | 20         | 20         | 21         | 25         | 23         | 27         |
| ...Used with Mood Stabilizer, %                    | 77         | 72         | 71         | 63         | 63         | 61         | 51         | 55         | 55         | 52         | 51         | 47         |
| ...Used with Antidepressant, %                     | 38         | 38         | 40         | 40         | 47         | 43         | 43         | 38         | 37         | 35         | 37         | 38         |
| ...Used with Anxiolytic, %                         | 17         | 19         | 15         | 12         | 15         | 14         | 17         | 16         | 17         | 17         | 16         | 17         |
| ...Used with Other Therapy, %                      | 4          | 3          | 5          | 5          | 3          | 4          | 3          | 3          | 4          | 3          | 4          | 5          |
| <b>Total Visits where atypical used (millions)</b> | <b>0.7</b> | <b>0.7</b> | <b>0.9</b> | <b>1.2</b> | <b>2.0</b> | <b>2.2</b> | <b>2.4</b> | <b>3.3</b> | <b>4.0</b> | <b>4.1</b> | <b>3.9</b> | <b>3.8</b> |

Column percents exceed 100% because rows are not mutually exclusive (e.g., atypical prescribed with both antidepressant and anxiolytic would contribute to two rows); "Other" includes stimulants and typical antipsychotics;  
Source: IMS Health National Disease and Therapeutic Index™, 1998-2009
