# Supplementary material for: Trends in Use of Second-Generation Antipsychotics for Treatment of Bipolar Disorder in the United States, 1998–2009
Source: Atypon-hosted journal article supplement (doi:10.1176/appi.ps.201100092), 2012-01-01
Supplement: pss6301_83_ds3.pdf [file pss6301_83_ds3.pdf]

**ONLINE ONLY APPENDIX TABLE 3. TREATMENT CATEGORIES.**

| <b>ATYPICALS</b> | <b>MOOD STABILIZERS</b> | <b>ANXIOLYTICS</b> | <b>ANTIDEPRESSANTS</b> | <b>OTHER THERAPIES</b> |
|------------------|-------------------------|--------------------|------------------------|------------------------|
| Clozaril         | Lamictal                | Klonopin           | Lexapro                | Provigil               |
| Risperdal        | Depakote                | Clonazepam         | Zoloft                 | Adderall               |
| Zyprexa          | Depakote ER             | Xanax              | Sertraline             | Ritalin                |
| Seroquel         | Valproic Acid           | Xanax XR           | Effexor                | Vyvanse                |
| Geodon           | Stavzor                 | Alprazolam         | Venlafaxine            | Haldol                 |
| Abilify          | Trileptal               | Ativan             | Wellbutrin             | Thiothixene            |
| Invega           | Topamax                 | Ativan INJ         | Wellbutrin XL          | Trilafon               |
|                  | Lamotrigine             | Lorazepam          | Wellbutrin SR          | Stelazine              |
|                  | Tegretol                | Valium             | Bupropion              | Cogentin               |
|                  | Tegretol XR             | Restoril           | Bupropion HCL XL       | Vistaril               |
|                  | Equetro                 | Halcion            | Trazodone              | Phenergan              |
|                  | Neurontin               | Temazepam          | Desyrel                | Cytomel                |
|                  | Gabapentin              | Librium            | Prozac                 | Cerefolin NAC          |
|                  | Divalproex SOD          | Ambien             | Fluoxetine             | Multivit               |
|                  | Topiramate              | Ambien CR          | Cymbalta               | Propranolol            |
|                  | Lithium carb            | Buspar             | Celexa                 | Clonidine              |
|                  | Lithium unspecifie      | Lunesta            | Paxil                  |                        |
|                  | Eskalith                | Zolpidem           | Paxil CR               |                        |
|                  | Lithobid                | Sonata             | Paroxetine HCl         |                        |
|                  |                         |                    | Pristiq                |                        |
|                  |                         |                    | Remeron                |                        |
|                  |                         |                    | Citalopram             |                        |
|                  |                         |                    | Symbyax                |                        |
|                  |                         |                    | Elavil                 |                        |
|                  |                         |                    | Nortriptyline          |                        |
|                  |                         |                    | Parnate                |                        |
|                  |                         |                    | Serzone                |                        |
